# Supplementary material for: Evaluation of Dentinal Microcracks following Diode Laser- and Ultrasonic-Activated Removal of Bioceramic Material during Root Canal Retreatment
Source: Hindawi journal article supplement (doi:10.1155/2022/6319743), 2022-11-21
Supplement: f1 [file 6319743.f1.pdf]

| NO | BL DIS | MD DIS | WL      | IBR(GAT) | ON  | SUF | Pre total               |                        |                    |                       |                 |                  |              |                 |                 |                  | total #      |                 |                               |                              |                          |                             |             |              |          |             | total #                       |                              |                          |                             |             |              |          |             |                               |                              | total #                  |                             |             |              |          |             |  |  |  |  |
|----|--------|--------|---------|----------|-----|-----|-------------------------|------------------------|--------------------|-----------------------|-----------------|------------------|--------------|-----------------|-----------------|------------------|--------------|-----------------|-------------------------------|------------------------------|--------------------------|-----------------------------|-------------|--------------|----------|-------------|-------------------------------|------------------------------|--------------------------|-----------------------------|-------------|--------------|----------|-------------|-------------------------------|------------------------------|--------------------------|-----------------------------|-------------|--------------|----------|-------------|--|--|--|--|
|    |        |        |         |          |     |     | # of slices with cracks | # of slices in coronal | # of slices in mid | # of slices in apical | Pre % of cracks | Pre % of coronal | Pre % of mid | Pre % of apical | Pre % of cracks | Pre % of coronal | Pre % of mid | Pre % of apical | total # of slices with cracks | total # of slices in coronal | total # of slices in mid | total # of slices in apical | % of cracks | % of coronal | % of mid | % of apical | total # of slices with cracks | total # of slices in coronal | total # of slices in mid | total # of slices in apical | % of cracks | % of coronal | % of mid | % of apical | total # of slices with cracks | total # of slices in coronal | total # of slices in mid | total # of slices in apical | % of cracks | % of coronal | % of mid | % of apical |  |  |  |  |
| 35 | 0.5 mm | 0.3 mm | 15 mm   | Lc       | yes | 125 | 60                      | 65                     | 0                  | 21.82                 | 70.91           | 71               | 0            | 125             | 60              | 65               | 0            | 21.82           | 70.91                         | 71                           | 0                        | 154                         | 89          | 56           | 0        | 56          | 97.09                         | 61                           | 0                        | 250                         | 118         | 132          | 0        | 90.91       | 128.73                        | 144                          | 0                        |                             |             |              |          |             |  |  |  |  |
| 39 | 0.7 mm | 0.3 mm | 17 mm   | Lc       | yes | 0   | 0                       | 0                      | 0                  | 0                     | 0               | 0                | 0            | 0               | 0               | 0                | 0            | 0               | 0                             | 0                            | 0                        | 170                         | 99          | 71           | 0        | 57.05       | 99.66                         | 71                           | 0                        | 182                         | 99          | 83           | 0        | 61.07       | 99.66                         | 84                           | 0                        |                             |             |              |          |             |  |  |  |  |
| 40 | 0.8 mm | 0.7 mm | 17 mm   | Lc       | yes | 0   | 0                       | 0                      | 0                  | 0                     | 0               | 0                | 0            | 3               | 0               | 3                | 0            | 1.06            | 0                             | 3                            | 0                        | 3                           | 0           | 3            | 0        | 1.06        | 0                             | 3                            | 0                        | 144                         | 63          | 81           | 0        | 50.88       | 66.78                         | 86                           | 0                        |                             |             |              |          |             |  |  |  |  |
| 41 | 0.8 mm | 0.5 mm | 17 mm   | Lc       | yes | 0   | 0                       | 0                      | 0                  | 0                     | 0               | 0                | 0            | 30              | 8               | 17               | 5            | 9.93            | 7.92                          | 17                           | 4.85                     | 166                         | 101         | 56           | 9        | 54.97       | 100                           | 55                           | 8.91                     | 235                         | 101         | 101          | 33       | 77.81       | 100.93                        | 100                          | 32.78                    |                             |             |              |          |             |  |  |  |  |
| 44 | 1 mm   | 0.6 mm | 16.5 mm | Lc       | No  | 0   | 0                       | 0                      | 0                  | 0                     | 0               | 0                | 0            | 0               | 0               | 0                | 0            | 0               | 0                             | 0                            | 0                        | 0                           | 0           | 0            | 0        | 0           | 0                             | 0                            | 0                        | 0                           | 0           | 0            | 0        | 0           | 0                             | 0                            | 0                        |                             |             |              |          |             |  |  |  |  |
| 45 | 0.5 mm | 0.4 mm | 16 mm   | Lc       | No  | 0   | 0                       | 0                      | 0                  | 0                     | 0               | 0                | 0            | 0               | 0               | 0                | 0            | 0               | 0                             | 0                            | 0                        | 170                         | 94          | 76           | 0        | 60.07       | 99.65                         | 81                           | 0                        | 170                         | 94          | 76           | 0        | 60.07       | 99.65                         | 81                           | 0                        |                             |             |              |          |             |  |  |  |  |
| 46 | 1 mm   | 0.7 mm | 16 mm   | Lc       | No  | 0   | 0                       | 0                      | 0                  | 0                     | 0               | 0                | 0            | 0               | 0               | 0                | 0            | 0               | 0                             | 0                            | 0                        | 140                         | 86          | 54           | 0        | 54.05       | 99.61                         | 63                           | 0                        | 148                         | 86          | 62           | 0        | 57.34       | 99.61                         | 72                           | 0                        |                             |             |              |          |             |  |  |  |  |
| 17 | 1.1    | 0.5    | 18 mm   | Lc       | No  | 27  | 27                      | 0                      | 0                  | 9.28                  | 27.84           | 0                | 0            | 59              | 20              | 22               | 18           | 21.45           | 21.82                         | 24                           | 19.64                    | 59                          | 20          | 22           | 18       | 21.45       | 21.82                         | 24                           | 19.64                    | 159                         | 51          | 92           | 17       | 57.82       | 55.64                         | 100                          | 18.55                    |                             |             |              |          |             |  |  |  |  |
| 36 | 0.6 mm | 0.5 mm | 18 mm   | Lc       | yes | 64  | 53                      | 3                      | 8                  | 21.33                 | 53              | 3                | 8            | 64              | 53              | 3                | 8            | 21.33           | 53                            | 3                            | 8                        | 146                         | 96          | 42           | 8        | 48.67       | 96                            | 42                           | 8                        | 163                         | 99          | 56           | 8        | 54.33       | 99                            | 56                           | 8                        |                             |             |              |          |             |  |  |  |  |
| 42 | 0.5 mm | 0.4 mm | 17 mm   | Lc       | yes | 0   | 0                       | 0                      | 0                  | 0                     | 0               | 0                | 0            | 0               | 0               | 0                | 0            | 0               | 0                             | 0                            | 0                        | 151                         | 95          | 56           | 0        | 51.17       | 100.35                        | 59                           | 0                        | 151                         | 95          | 56           | 0        | 51.17       | 100.35                        | 59                           | 0                        |                             |             |              |          |             |  |  |  |  |
| 1  | 0.6 mm | 0.7 mm | 15.5 mm | US       | yes | 185 | 85                      | 95                     | 5                  | 64.69                 | 89.16           | 100              | 5.24         | 185             | 95              | 90               | 0            | 64.69           | 99.65                         | 94                           | 0                        | 224                         | 80          | 95           | 49       | 78.32       | 83.92                         | 100                          | 51.4                     | 238                         | 93          | 93           | 52       | 85          | 99.64                         | 100                          | 55.71                    |                             |             |              |          |             |  |  |  |  |
| 2  | 0.8 mm | 0.4 mm | 15 mm   | US       | yes | 71  | 71                      | 0                      | 0                  | 28.51                 | 85.54           | 0                | 0            | 106             | 78              | 28               | 0            | 45.49           | 100.43                        | 36                           | 0                        | 168                         | 83          | 83           | 2        | 67.47       | 100                           | 100                          | 2.41                     | 168                         | 83          | 83           | 2        | 67.47       | 100                           | 100                          | 2.41                     |                             |             |              |          |             |  |  |  |  |
| 3  | 0.6 mm | 0.6 mm | 19 mm   | US       | yes | 7   | 2                       | 4                      | 0                  | 2.67                  | 3.44            | 5                | 0            | 16              | 20              | 6                | 0            | 9.92            | 22.9                          | 7                            | 0                        | 98                          | 87          | 11           | 0        | 97.4        | 99.62                         | 13                           | 0                        | 128                         | 87          | 41           | 0        | 48.85       | 99.62                         | 47                           | 0                        |                             |             |              |          |             |  |  |  |  |
| 9  | 0.3 mm | 0.4 mm | 17 mm   | US       | No  | 103 | 0                       | 81                     | 22                 | 39.02                 | 0               | 92               | 25           | 199             | 54              | 86               | 53           | 74.52           | 62.55                         | 100                          | 61.39                    | 212                         | 63          | 88           | 61       | 80.3        | 71.59                         | 100                          | 69.32                    | 225                         | 100         | 88           | 37       | 88.23       | 113.64                        | 100                          | 42.05                    |                             |             |              |          |             |  |  |  |  |
| 10 | 0.3 mm | 0.3 mm | 15 mm   | US       | No  | 22  | 18                      | 4                      | 0                  | 8.49                  | 20.85           | 5                | 0            | 59              | 27              | 32               | 0            | 22.78           | 31.27                         | 37                           | 0                        | 131                         | 25          | 76           | 30       | 51.57       | 29.53                         | 90                           | 35.43                    | 175                         | 86          | 86           | 3        | 67.57       | 99.61                         | 100                          | 3.47                     |                             |             |              |          |             |  |  |  |  |
| 13 | 1.4 mm | 0.8 mm | 16 mm   | US       | No  | 147 | 83                      | 64                     | 0                  | 59.06                 | 100             | 77               | 0            | 163             | 84              | 79               | 0            | 64.68           | 100                           | 94                           | 0                        | 221                         | 84          | 84           | 53       | 87.7        | 100                           | 100                          | 64.1                     | 226                         | 84          | 84           | 58       | 89.68       | 100                           | 100                          | 66.05                    |                             |             |              |          |             |  |  |  |  |
| 7  | 0.4 mm | 0.5 mm | 16 mm   | US       | yes | 20  | 0                       | 20                     | 0                  | 8.13                  | 0               | 24               | 0            | 25              | 0               | 25               | 0            | 9.88            | 0                             | 30                           | 0                        | 25                          | 0           | 25           | 0        | 9.88        | 0                             | 30                           | 0                        | 111                         | 5           | 82           | 24       | 46.12       | 6.1                           | 100                          | 29.27                    |                             |             |              |          |             |  |  |  |  |
| 8  | 0.5 mm | 0.5 mm | 16 mm   | US       | yes | 33  | 0                       | 33                     | 0                  | 13.75                 | 0               | 41               | 0            | 36              | 0               | 36               | 0            | 14.94           | 0                             | 45                           | 0                        | 36                          | 0           | 36           | 0        | 14.94       | 0                             | 45                           | 0                        | 126                         | 48          | 78           | 0        | 51.85       | 59.26                         | 96                           | 0                        |                             |             |              |          |             |  |  |  |  |
| 14 | 0.5 mm | 0.4 mm | 15 mm   | US       | no  | 153 | 81                      | 68                     | 4                  | 62.45                 | 100.41          | 84               | 4.9          | 164             | 81              | 79               | 4            | 67              | 100                           | 97.5                         | 4.9                      | 167                         | 82          | 82           | 3        | 72.65       | 100.41                        | 100                          | 3.65                     | 178                         | 82          | 82           | 14       | 77.43       | 100.41                        | 100                          | 17.14                    |                             |             |              |          |             |  |  |  |  |
| 15 | 0.6 mm | 0.3 mm | 19 mm   | US       | no  | 204 | 96                      | 96                     | 12                 | 70.3                  | 100             | 100              | 12.5         | 204             | 96              | 96               | 12           | 70.3            | 100                           | 100                          | 12.5                     | 204                         | 96          | 96           | 12       | 70.3        | 100                           | 100                          | 12.5                     | 204                         | 96          | 96           | 12       | 70.3        | 100                           | 100                          | 12.5                     |                             |             |              |          |             |  |  |  |  |
| 20 | 1      | 0.5    | 15.5 mm | Cont     |     | 92  | 0                       | 34                     | 58                 | 36.51                 | 0               | 40               | 69.05        | 94              | 0               | 29               | 65           | 37.45           | 0                             | 35                           | 77.69                    | 138                         | 44          | 65           | 29       | 54.98       | 52.59                         | 78                           | 34.66                    |                             |             |              |          |             |                               |                              |                          |                             |             |              |          |             |  |  |  |  |
| 21 | 1.2    | 0.5    | 17 mm   | Cont     |     | 9   | 0                       | 9                      | 0                  | 1.46                  | 0               | 10               | 0            | 9               | 0               | 9                | 0            | 3.47            | 0                             | 10                           | 0                        | 161                         | 87          | 74           | 0        | 61.92       | 100.38                        | 85                           | 0                        |                             |             |              |          |             |                               |                              |                          |                             |             |              |          |             |  |  |  |  |
| 23 | 0.4    | 0.5    | 18 mm   | Cont     |     | 105 | 67                      | 34                     | 4                  | 39.79                 | 70.28           | 36               | 4.2          | 128             | 50              | 65               | 13           | 42.67           | 50                            | 65                           | 13                       | 152                         | 99          | 49           | 4        | 51.35       | 100.34                        | 50                           | 4.05                     |                             |             |              |          |             |                               |                              |                          |                             |             |              |          |             |  |  |  |  |
| 24 | 1.2    | 0.5    | 18 mm   | Cont     |     | 0   | 0                       | 0                      | 0                  | 0                     | 0               | 0                | 0            | 0               | 0               | 0                | 0            | 0               | 0                             | 0                            | 0                        | 7                           | 0           | 7            | 0        | 2.86        | 0                             | 9                            | 0                        |                             |             |              |          |             |                               |                              |                          |                             |             |              |          |             |  |  |  |  |
| 25 | 0.3    | 0.5    | 16.5 mm | Cont     |     | 150 | 0                       | 88                     | 62                 | 53.57                 | 0               | 94               | 66.43        | 172             | 21              | 92               | 59           | 62.32           | 22.83                         | 100                          | 64.13                    | 172                         | 21          | 92           | 59       | 62.32       | 22.83                         | 100                          | 64.13                    |                             |             |              |          |             |                               |                              |                          |                             |             |              |          |             |  |  |  |  |
| 27 | 0.6    | 0.5    | 16.5 mm | Cont     |     | 10  | 0                       | 10                     | 0                  | 3.4                   | 0               | 10               | 0            | 10              | 0               | 10               | 0            | 3.4             | 0                             | 10                           | 0                        | 29                          | 19          | 10           | 0        | 9.86        | 39.39                         | 10                           | 0                        |                             |             |              |          |             |                               |                              |                          |                             |             |              |          |             |  |  |  |  |
| 28 | 0.8    | 0.5    | 16 mm   | Cont     |     | 73  | 25                      | 48                     | 0                  | 28.63                 | 29.41           | 56               | 0            | 116             | 77              | 39               | 0            | 45.31           | 90.23                         | 46                           | 0                        | 124                         | 85          | 39           | 0        | 48.4375     | 99.6094                       | 45.7031                      | 0                        |                             |             |              |          |             |                               |                              |                          |                             |             |              |          |             |  |  |  |  |
| 29 | 0.6    | 0.4    | 15.5 mm | Cont     |     | 0   | 0                       | 0                      | 0                  | 0                     | 0               | 0                | 0            | 0               | 0               | 0                | 0            | 0               | 0                             | 0                            | 0                        | 12                          | 5           | 7            | 0        | 4.78        | 5.98                          | 8                            | 0                        |                             |             |              |          |             |                               |                              |                          |                             |             |              |          |             |  |  |  |  |
| 19 | 1.1    | 0.6    | 14.5 mm | Cont     |     | 0   | 0                       | 0                      | 0                  | 0                     | 0               | 0                | 0            | 3               | 0               | 3                | 0            | 1.18            | 0                             | 0                            | 3.53                     | 79                          | 85          | 0            | 0        | 31.1        | 100.29                        | 0                            | 0                        |                             |             |              |          |             |                               |                              |                          |                             |             |              |          |             |  |  |  |  |
| 34 | 1      | 0.7    | 17 mm   | Cont     |     | 62  | 0                       | 47                     | 15                 | 24.31                 | 0               | 55               | 17.65        | 62              | 0               | 47               | 15           | 24.31           | 0                             | 55                           | 17.65                    | 174                         | 74          | 82           | 18       | 69.6        | 92.5                          | 103                          | 21.1765                  |                             |             |              |          |             |                               |                              |                          |                             |             |              |          |             |  |  |  |  |
